# Supplementary material
Source: ML conference proceedings conference paper supplement (https://openreview.net/forum?id=DJ6fmWG4qvW)
Supplement: supplementary_material [file attachment]

## 1 A Supplementary Materials

### 2 A.1 Experiment Dataset

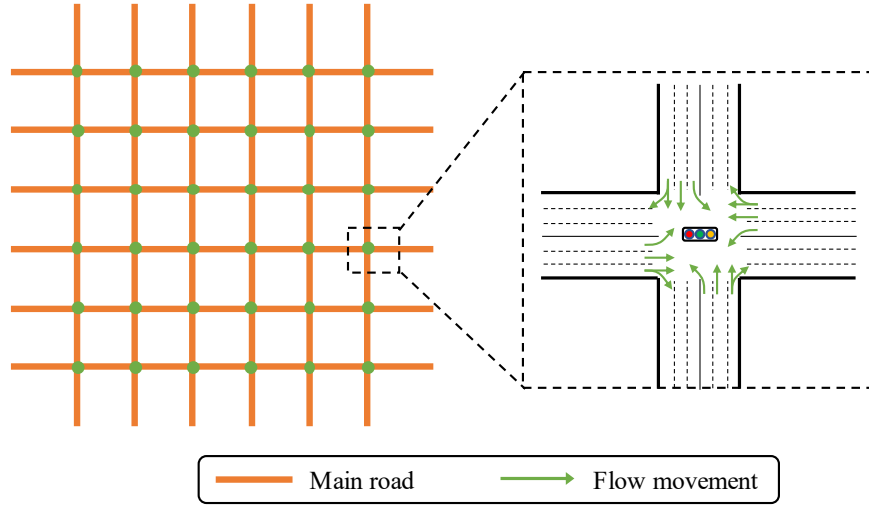

Figure 1: The  $6 \times 6$  synthetic grid network and the flow movements at a single intersection

3 Figure 1 shows the  $6 \times 6$  synthetic grid network used in the experiment. There are totally 36 homoge-  
4 neous intersections in this network. Each intersection has 4 incoming directions and 12 incoming  
5 lanes. For the vehicle flow from one direction, there are 3 movements (i.e., right-turn, straight, and left-  
6 turn). Each intersection has four candidate actions (i.e., phase combinations that can be set to green for  
7 a given time instant): {West  $\rightarrow$  East, West  $\rightarrow$  South, East  $\rightarrow$  West, East  $\rightarrow$  North}, {West  $\rightarrow$   
8 North, East  $\rightarrow$  South}, {South  $\rightarrow$  North, South  $\rightarrow$  East, North  $\rightarrow$  South, North  $\rightarrow$  West}  
9 and {South  $\rightarrow$  West, North  $\rightarrow$  East}.
