# Supplementary material
Source: ML conference proceedings conference paper supplement (https://openreview.net/forum?id=DJ6fmWG4qvW)

comb attention

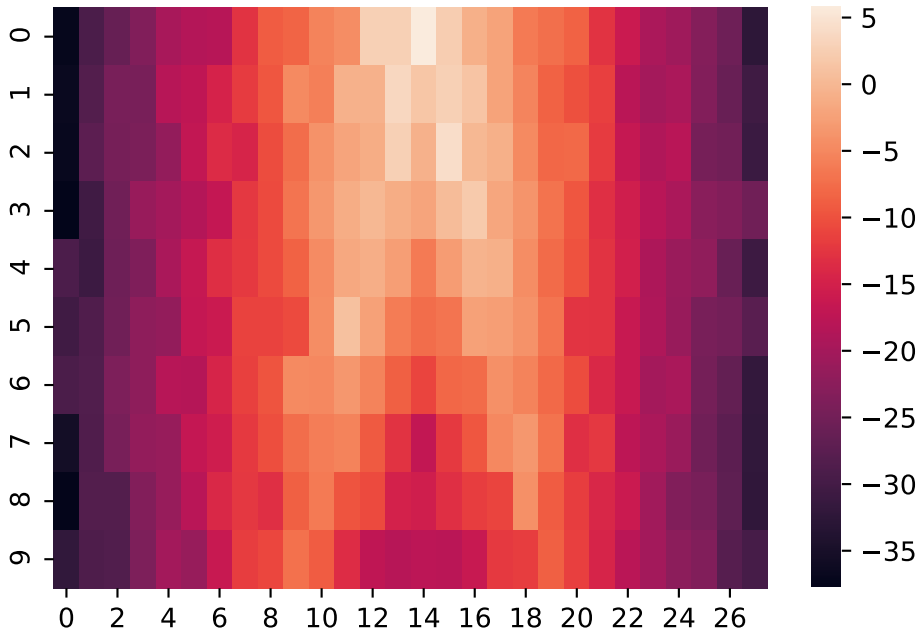

Supplement: supplementary_material [file attachment]

Cone Decay Prior

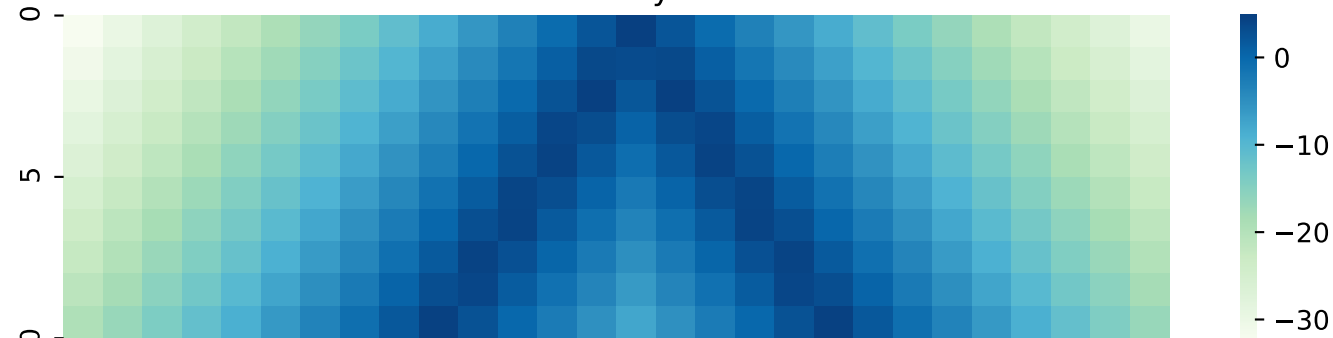

Time Decay Prior + LUT

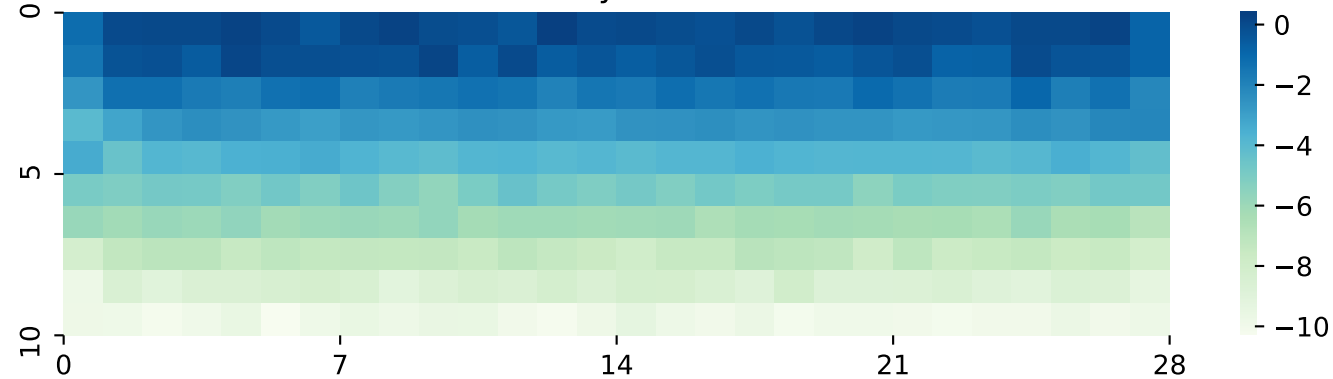

Supplement: supplementary_material [file attachment]

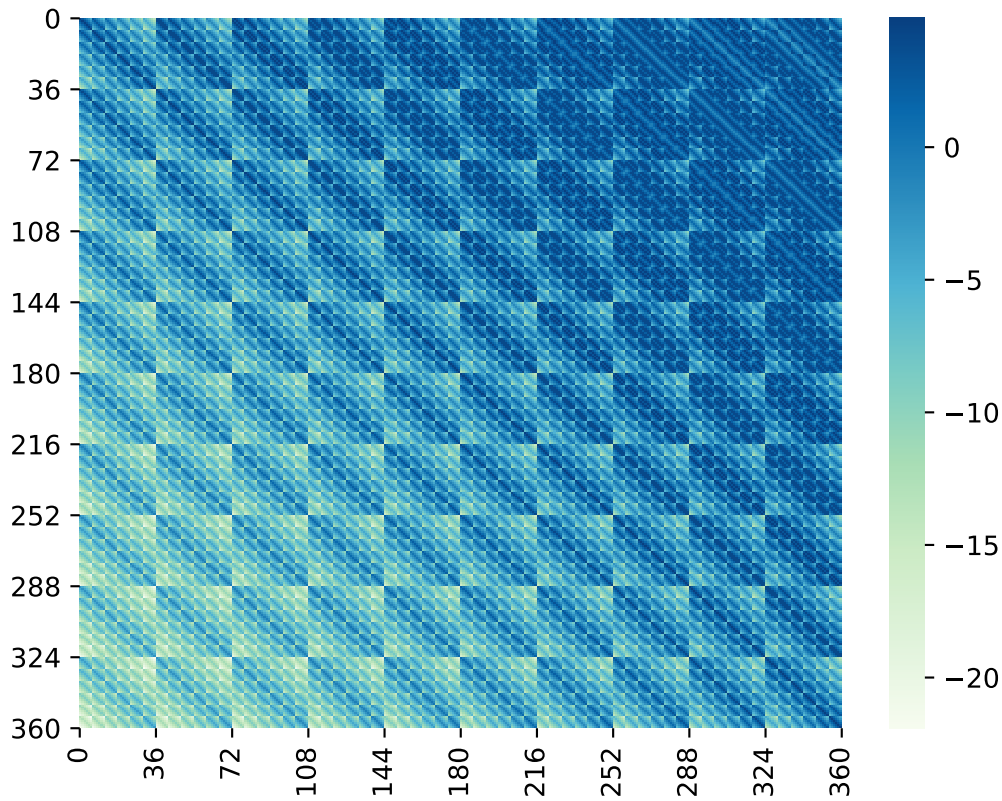

Supplement: supplementary_material [file attachment]

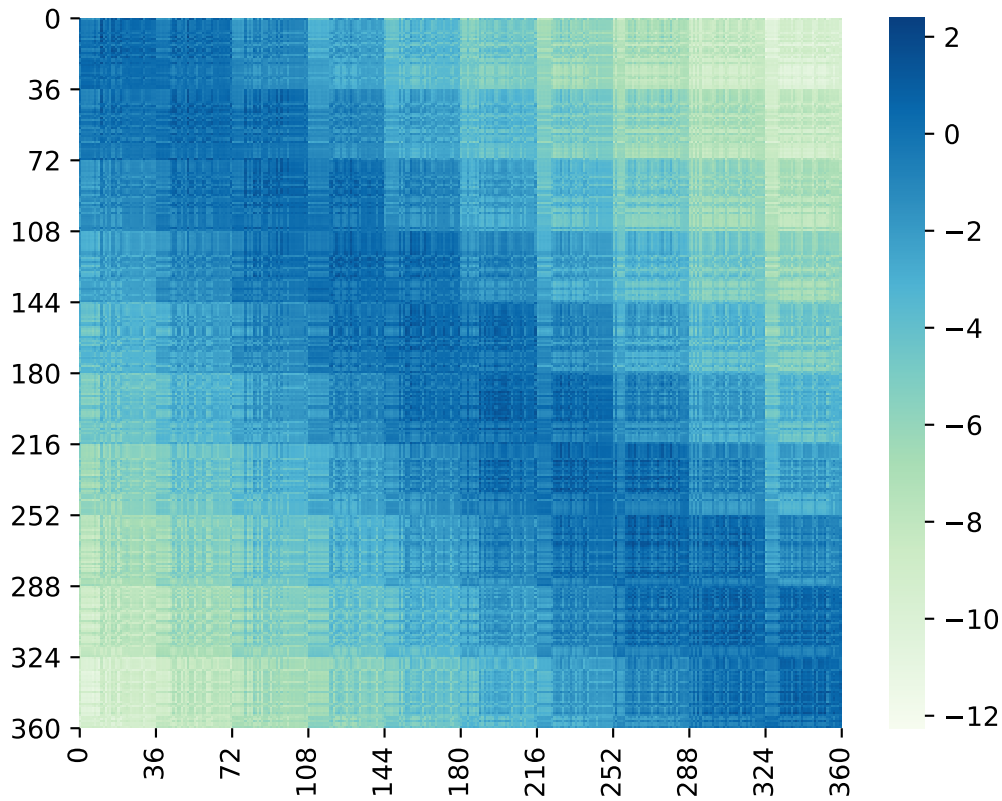

Supplement: supplementary_material [file attachment]

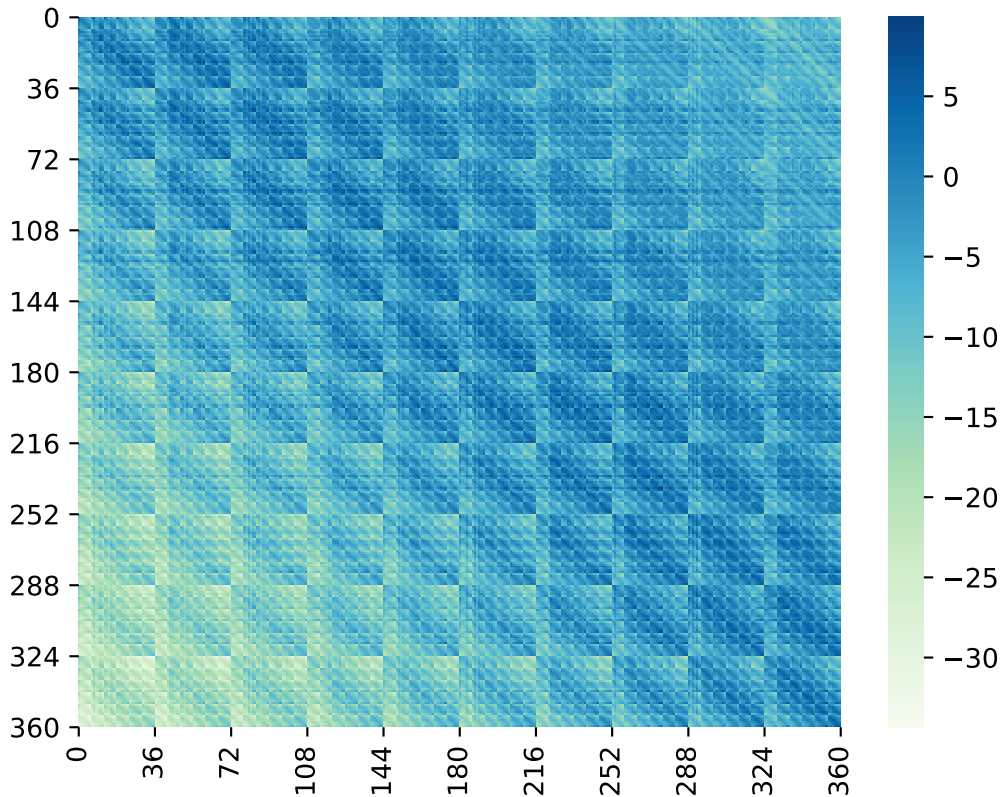

Supplement: supplementary_material [file attachment]

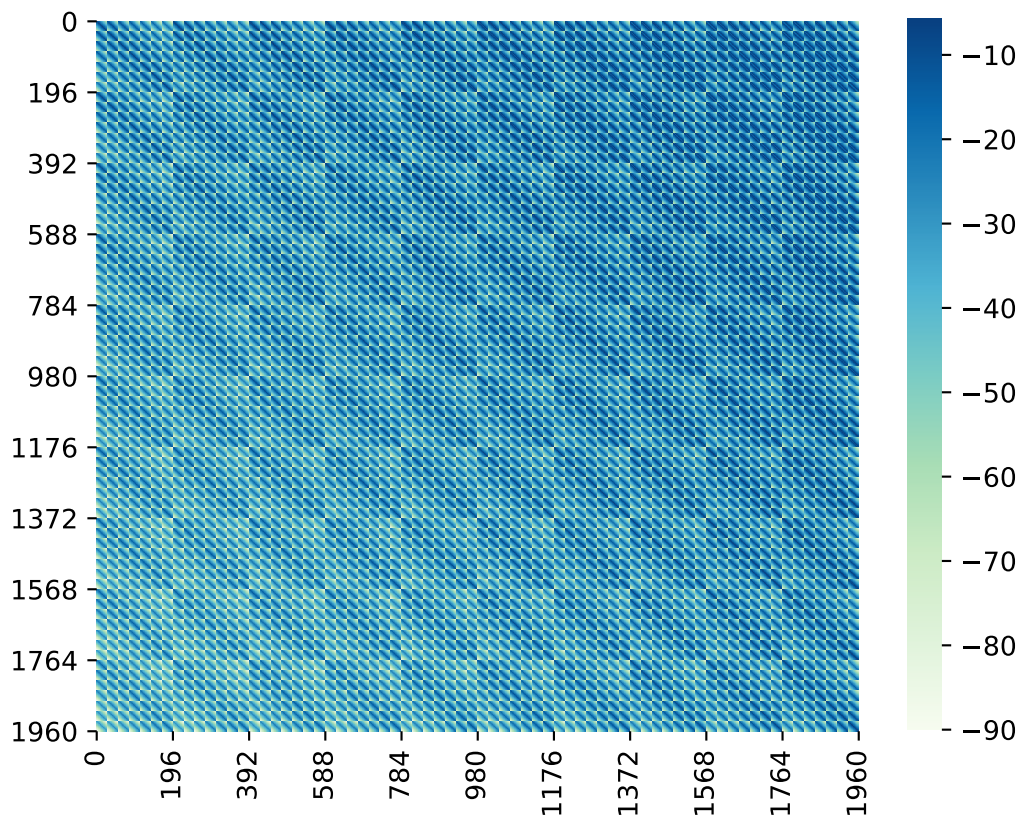

Supplement: supplementary_material [file attachment]

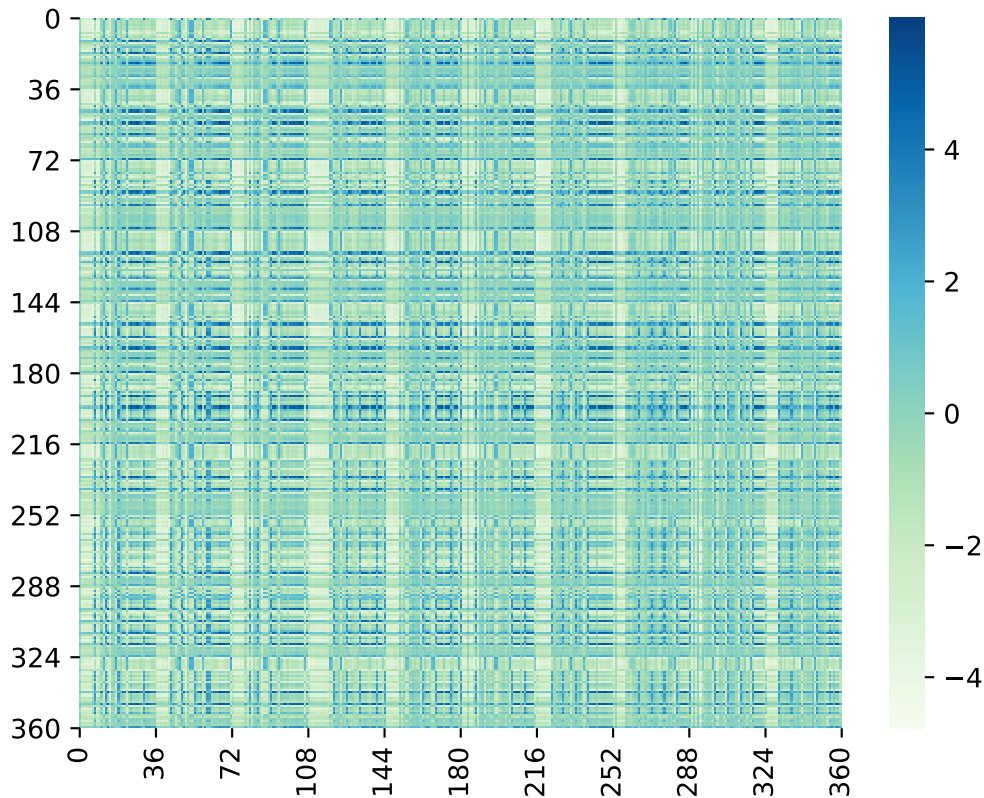

Supplement: supplementary_material [file attachment]

Residual Normal Attention

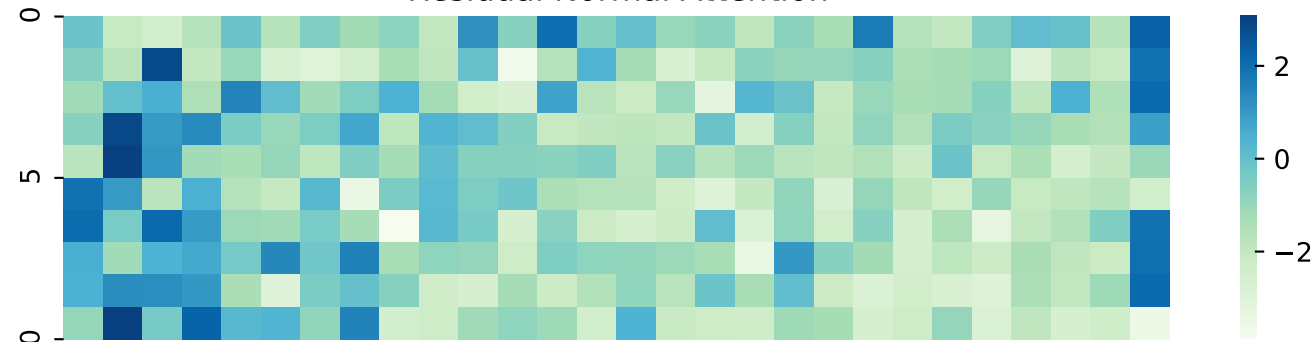

Overall Attention

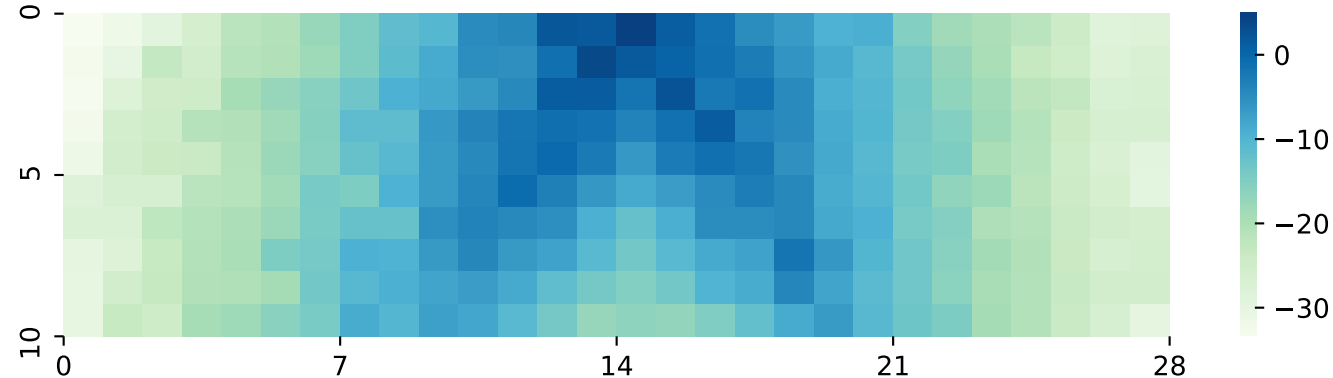

Supplement: supplementary_material [file attachment]
